## RESEARCH ARTICLE

## Household water treatment practice and associated factors in Ethiopia: A systematic review and meta-analysis

Belay Desye<sup>1,2\*</sup>, Amensisa Hailu Tesfaye<sup>3</sup>, Gete Berihun<sup>1</sup>, Tadesse Sisay<sup>1</sup>, Chala Daba<sup>1</sup>, Leykun Berhanu<sup>1</sup>

**1** Department of Environmental Health, College of Medicine and Health Sciences, Wollo University, Dessie, Ethiopia, **2** Department of Public Health, College of Medicine and Health Sciences, Adigrat University, Adigrat, Ethiopia, **3** Department of Environmental and Occupational Health and Safety, Institute of Public Health, College of Medicine and Health Sciences, University of Gondar, Gondar, Ethiopia

\* [belaydesye.2001@gmail.com](mailto:belaydesye.2001@gmail.com)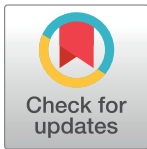

## OPEN ACCESS

**Citation:** Desye B, Tesfaye AH, Berihun G, Sisay T, Daba C, Berhanu L (2023) Household water treatment practice and associated factors in Ethiopia: A systematic review and meta-analysis. PLoS ONE 18(6): e0285794. <https://doi.org/10.1371/journal.pone.0285794>

**Editor:** D. Daniel, Gadjah Mada University Faculty of Medicine, Public Health, and Nursing: Universitas Gadjah Mada Fakultas Kedokteran Kesehatan Masyarakat dan Keperawatan, INDONESIA

**Received:** February 16, 2023

**Accepted:** May 2, 2023

**Published:** June 8, 2023

**Copyright:** © 2023 Desye et al. This is an open access article distributed under the terms of the [Creative Commons Attribution License](https://creativecommons.org/licenses/by/4.0/), which permits unrestricted use, distribution, and reproduction in any medium, provided the original author and source are credited.

**Data Availability Statement:** All relevant data are within the manuscript and its [Supporting Information](#) files.

**Funding:** The author(s) received no specific funding for this work.

**Competing interests:** The authors have declared that no competing interests exist.

## Abstract

The provision of potable water is crucial to ensuring the health and dignity of individuals. In many developing countries, including Ethiopia, waterborne disease has become a major public health problem. There is a significant gap in accessing comprehensive national-wide evidence on Household Water Treatment (HWT) practices and associated factors in Ethiopia. Therefore, this study aims to assess the pooled HWT practice and associated factors in Ethiopia. A comprehensive search of published studies before October 15, 2022, was identified using databases and other sources. Data were extracted using Microsoft Excel, and analysis was performed using STATA 14/SE software. A random-effects model was used to estimate the pooled proportion of HWT practices and the odds ratio of associated factors. The funnel plot and Egger's regression test were used to assess publication bias, and  $I^2$  test statistics was used to assess heterogeneity. Duval and Tweedie's "trim and fill" method was performed to adjust the pooled estimate. A subgroup analysis was also conducted to identify the sources of heterogeneity. In this study, a total of 708 articles were retrieved, and 16 eligible studies were included. The pooled proportion of HWT practice in Ethiopia was found to be 21% (95% CI: 17–24). Having a formal education (OR: 2.42, 95% CI (2.11–2.74)), being male (OR: 1.32, 95% CI (1.13–1.51)), owning radio (OR: 1.33, 95% CI (1.18–1.47)), having a higher income (OR: 1.73, 95% CI (1.41–2.04)), unimproved water source (OR: 1.71, 95% CI (1.41–2.01)), fetching water at more frequently (OR: 3.31, 95% CI (1.99–4.64)), dipping methods of water drawing (OR: 2.08, 95% CI (1.66–2.51)), and taken training of water treatment (OR: 2.15, 95% CI (1.55–2.75)) were all found to be associated with HWT practice. Based on the findings of this study, the pooled proportion of HWT practice in Ethiopia was found to be one-fifth, which indicated that it was significantly low. Therefore, the authors recommend that households could better receive adequate information about HWT practices through strengthened health education and intensive training on HWT.

## Introduction

The provision of and access to potable water are crucial to ensuring the health and dignity of individuals [1]. The United Nations recognizes access to safe water and sanitation as a fundamental human right. Everyone has the right to access sufficient, safe, acceptable, affordable, accessible, and continuous water for personal and domestic use [2]. Household water treatment is an important public health intervention as it can be adopted at the point of use in homes, thus minimizing the risk of recontamination. It is especially important when the water source is unimproved and when there is a possibility of recontamination during transport, storage, and consumption processes. Moreover, it can be used even in areas with piped water supply as water supply interruptions happen [1, 3, 4]. Household water treatment has been the most simple and cost-effective means of improving water quality and preventing waterborne diseases [1, 5, 6].

Household water treatment becomes the most appropriate water treatment when communities lack the capacity to develop large-scale water treatment systems due to their many operation and maintenance issues requirements [1]. The major methods of HWT are boiling, filtration, solar disinfection (SODIS), chlorination, and household water storage. Selecting the most appropriate treatment method depends on the condition of water quality, cultural acceptability, feasibility, availability of technology, and other conditions [7, 8].

A significant proportion of diarrheal diseases can be prevented through safe drinking water, adequate sanitation, and hygiene [5, 9]. According to the World Health Organization (WHO), HWT can reduce episodes of diarrheal disease by 39% [7]. Considering this, Sustainable Development Goal (SDG) #6 calls to ensure the availability and sustainable management of water and sanitation for all by 2030 [10]. Globally, safely managed drinking water at home was at 74%, in Sub-Saharan Africa it was at 30%, and in Ethiopia it was at 13% in 2020 [2]. Despite progress towards household coverage of properly safely managed drinking water was slightly improved, 844 million people in the world still lack access to basic water services, and over 2.1 billion people lack access to safely managed drinking water on their premises [2]. Evidence from the Demographic and Health Survey (DHS) revealed that only 18% of households in Sub-Saharan Africa [11] and only 7% of households in Ethiopia appropriately treat their drinking water effectively [12].

Providing safe water to over one billion people who still lack access and millions more who still suffer from contamination of their improved water sources has been recognized as having economic benefits and sustainable health improvements [1, 13]. In most of the developing countries in the world, including Ethiopia, waterborne disease has been becoming a major public health problem due to the consumption of unsafe drinking water [14]. The quality of drinking water being supplied is often neglected, even if access to water supply has been substantially increased. Drinking water supplied by centralized treatment systems is likely to be contaminated due to poor distribution networks, inadequate management, and unhygienic handling prior to consumption [1].

A wide range of studies indicate that HWT can improve drinking water quality prior to consumption and has been found to be an appropriate and acceptable method that can reduce the risk of diarrhea significantly [15–18]. Studies revealed that HWT practice in Ethiopia was found to be in the range of 2.8% [19] to 76.3% [20], and determinant factors like educational status, training, and the nature of water sources were identified [21–23]. The findings were inconsistent, there was significant variation in the reporting level of HWT practice, and they did not have the same statistical significance for implementing appropriate interventions.

Based on the search of the database, there is no national-wide and systematic review and meta-analysis study conducted on the HWT practice and associated factors in Ethiopia.

According to the findings, there is inconsistency between the existing evidence, and there is a significant gap in accessing a comprehensive document regarding the HWT practice and associated factors in Ethiopia. Therefore, this review can provide well-organized data on the HWT practice and associated factors in Ethiopia. "What is the proportion of HWT practice in Ethiopia?" and "What are the factors associated with HWT practice in Ethiopia?" were the research questions for this study. The findings of this study could help health authorities, policymakers, Non-Governmental Organizations (NGOs), and WHO to develop and implement an appropriate strategy and effective intervention in HWT practice.

## Materials and methods

### Study setting

This study was conducted in Ethiopia. Ethiopia is located in the northeastern part of Africa, also known as the Horn of Africa. It shares borders with Djibouti to the northeast, Eritrea to the north, Kenya to the south, Somalia to the east and northeast, Sudan to the northwest, and South Sudan to the west. Currently, the Ethiopian population is estimated at 123,415,729, which makes it the second most populous country in Africa after Nigeria [24].

### Protocol and registration

The protocol for this review was registered in the International Prospective Register of Systematic Reviews (PROSPERO), the University of York Centre for Reviews and Dissemination (record code: CRD42022364976, October 17<sup>th</sup>, 2022).

### Information sources and search strategies

This review and meta-analysis were conducted according to the guidelines of Preferred Reporting Items for Systematic Reviews and Meta-Analyses (PRISMA). The four phases drawn from the PRISMA flowchart were documented in the results to show the study selection process from identification to the included studies [25] (S1 Table).

The following databases: PubMed/MEDLINE, Cochrane Library, Science Direct, and AJOL were searched for published studies before October 15, 2022. For the PubMed/MEDLINE search, the following key terms were used in combination with the Boolean operators "AND" and "OR". ("Household Water Treatment" [All Fields] OR "Point-of-Use Water Treatment" [All Fields] OR "Small Scale Water Treatment" [All Fields] OR "Household Water Treatment Practice" [All Fields] OR "Household Water Treatment Technologies" [All Fields] OR "Household Water Treatment Methods" [All Fields] OR "Household Water Treatment and Safe Storage" [All Fields] OR "Household Water Treatment Systems" [All Fields]) AND ("Associated Factors" [All Fields] OR "Determinants"[All Fields] OR "Risk Factors"[All Fields]) AND "Ethiopia" [All Fields].

In addition to the electronic database search, grey literature was identified from Google Scholar and direct Google searches. Moreover, the reference lists (bibliographies) of the included articles were also searched to obtain additional articles.

### Eligibility criteria

This systematic review and meta-analysis included studies conducted in Ethiopia that examined the proportion of HWT practice and associated factors.

**Inclusion criteria.** Articles that met the following criteria were considered for inclusion in this study.

- Population: Household heads.
- Outcomes of interest: Articles reported the proportion of HWT practice and its associated factors with HWT practice.
- Study design: A cross-sectional study.
- Study setting: Studies are conducted only in Ethiopia.
- Language of published articles: English.
- Publication issue: Peer-reviewed journal articles published before October 15, 2022.

**Exclusion criteria.** Systematic reviews, short communications, letters to editors, commentaries, and qualitative studies were excluded. In addition, articles that were not fully accessible after three email contacts with the corresponding author were excluded.

### Study selection process

Two investigators (BD and AHT) independently screened articles by their title, abstract, and full text to identify eligible articles using predetermined inclusion and exclusion criteria. The screened articles were compiled together by two investigators (BD and AHT), and discrepancies were resolved by consensus by involving a third reviewer (GB).

### Data extraction and management

The data extraction format included information such as the name of the author and publication year, study area, region, study setting, method of data collection, sampling methods, sample size, response rate, proportion of HWT practice, and risk of bias (Table 1). Zotero reference manager software was utilized to collect and organize search outcomes and for the removal of duplicate articles. The PRISMA flow diagram was used to summarize the selection process (Fig 1).

### Quality assessment

The Joanna Briggs Institute's (JBI) quality appraisal tools for cross-sectional studies were used to assess the quality of the included articles and the risk of bias in each study [26]. Two reviewers (BD and AHT) independently assessed the quality of the included articles. The assessment tool contains eight criteria: (1) clear inclusion and exclusion criteria; (2) description of the study subject and study setting; (3) use of a valid and reliable method to measure the exposure; (4) standard criteria used for measurement of the condition; (5) identification of confounding factors; (6) development of strategies to deal with confounding factors; (7) use of a valid and reliable method to measure the outcomes; and (8) use of appropriate statistical analysis. It was evaluated using the JBI critical appraisal checklist of cross-sectional study options: yes, no, unclear, and not applicable. The risks for biases were classified as low (total score, 6 to 8), moderate (total score, 3 or 5), or high (total score, 0 to 2). Finally, articles with low and moderate biases were considered in this review (S2 Table).

### Outcome of interest

There are two main outcomes of this review. The primary outcome of this study was the pooled proportion of HWT practice. It was determined using a percentage (%). The second outcome of this review was the pooled measure of the association between the HWT practice

**Table 1. Descriptive summary of included studies of HWT practice and associated factors in Ethiopia, 2023.**

| Author, publication year      | Study area                           | Study region      | Study setting | Methods of data collection | Sampling methods | Sample size | Response Rate (%) | Proportion of HWT practice (%) | Risk of bias |
|-------------------------------|--------------------------------------|-------------------|---------------|----------------------------|------------------|-------------|-------------------|--------------------------------|--------------|
| Berhanu and Hailu, 2015 [28]  | Bona                                 | SNNPR             | Rural         | IA and SSC                 | SRS              | 604         | 100               | 26.5                           | Low          |
| Tafesse et al., 2021 [29]     | Gibe                                 | SNNPR             | Rural & Urban | IA                         | STRS             | 633         | 99                | 34.5                           | Low          |
| Kassie and Hayelom, 2017 [19] | Farta                                | Amhara            | Rural         | IA and OC                  | SRS              | 834         | -                 | 2.8                            | Moderate     |
| Birara et al., 2018 [20]      | Bahir Dar city                       | Amhara            | Urban         | IA                         | Srs              | 459         | 91                | 76.3                           | Moderate     |
| W/tsaddik et al., 2022 [30]   | Bule                                 | SNNPR             | Urban         | IA                         | SRS              | 418         | 100               | 29.9                           | Low          |
| Damtew and Geremew, 2020 [31] | Ethiopia                             | All-region        | Rural & Urban | IA                         | SRS              | 16650       | -                 | 6.24                           | Low          |
| Eticha et al., 2022 [21]      | Ameya                                | Oromia            | Rural & Urban | IA                         | SRS              | 413         | -                 | 30.3                           | Low          |
| Geremew et al., 2018 [22]     | Ethiopia                             | All-region        | Rural & Urban | IA                         | SRS              | 16650       | -                 | 6.5                            | Low          |
| Admasie et al., 2022 [32]     | Sodo Zuria                           | SNNPR             | Rural         | IA                         | SRS              | 836         | 99.6              | 44.1                           | Low          |
| Belay et al., 2016 [23]       | Burie Zuria                          | Amhara            | Rural         | IA                         | SRS              | 797         | 94.2              | 44.8                           | Low          |
| Bitew et al., 2017 [33]       | Dabat                                | Amhara            | Rural & Urban | IA                         | Srs              | 845         | 100               | 23.1                           | Low          |
| Anley et al., 2020 [34]       | Degadamot                            | Amhara            | Rural         | IA                         | SRS              | 845         | 100               | 14.1                           | Low          |
| Geremew et al., 2019 [35]     | Kersa and Eastern hararge            | Oromia and Harari | Rural& Urban  | IA                         | SRS              | 377         | 100%              | 31                             | Low          |
| Azage et al., 2021 [36]       | Baso Liben, Yilmana Densa and Fogera | Amhara            | Rural         | IA                         | SRS              | 865         | 99.1              | 6                              | Low          |
| Merga et al., 2022 [37]       | Assosa district                      | Benishangul Gumuz | Rural & Urban | IA                         | SRS              | 378         | 95.17             | 13.2                           | Moderate     |
| Tsegaye et al., 2020 [38]     | Degadamot district                   | Amhara            | Rural         | IA                         | SRS              | 845         | 100               | 14                             | Moderate     |

**Keys:** SNNPR = South Nations, Nationalities, and people's representative, IA = Interviewer Administered, SSC = Sanitary Survey Checklist, OC = Observational Checklist, SRS = Systematic Random Sampling, Srs = Simple random sampling, STRS = Stratified random sampling, and— = Not found

<https://doi.org/10.1371/journal.pone.0285794.t001>

and associated factors in Ethiopia. It was determined using the pooled odds ratio (OR) with a 95% confidence interval.

### Statistical methods and data analysis

The extracted data were exported from a Microsoft Excel spreadsheet to STATA version 14/SE for further analysis. Heterogeneity among the included studies was quantitatively measured by the index of heterogeneity ( $I^2$  statistics), in which 25%–50%, 50%–75%, and >75% represented low, moderate, and high heterogeneity, respectively [27]. The overall pooled estimate was computed using the metaprop STATA command using the DerSimonian–Laird random effect model. Subgroup analysis was done by region, study setting, and year of publication to see the difference in the pooled proportion of HWT practices. The small-study effect was evaluated using the funnel plot and Egger's regression test, with a p-value  $\leq 0.05$  as a cutoff point to declare the presence of publication bias. A p-value  $\leq 0.05$  was used to declare the association

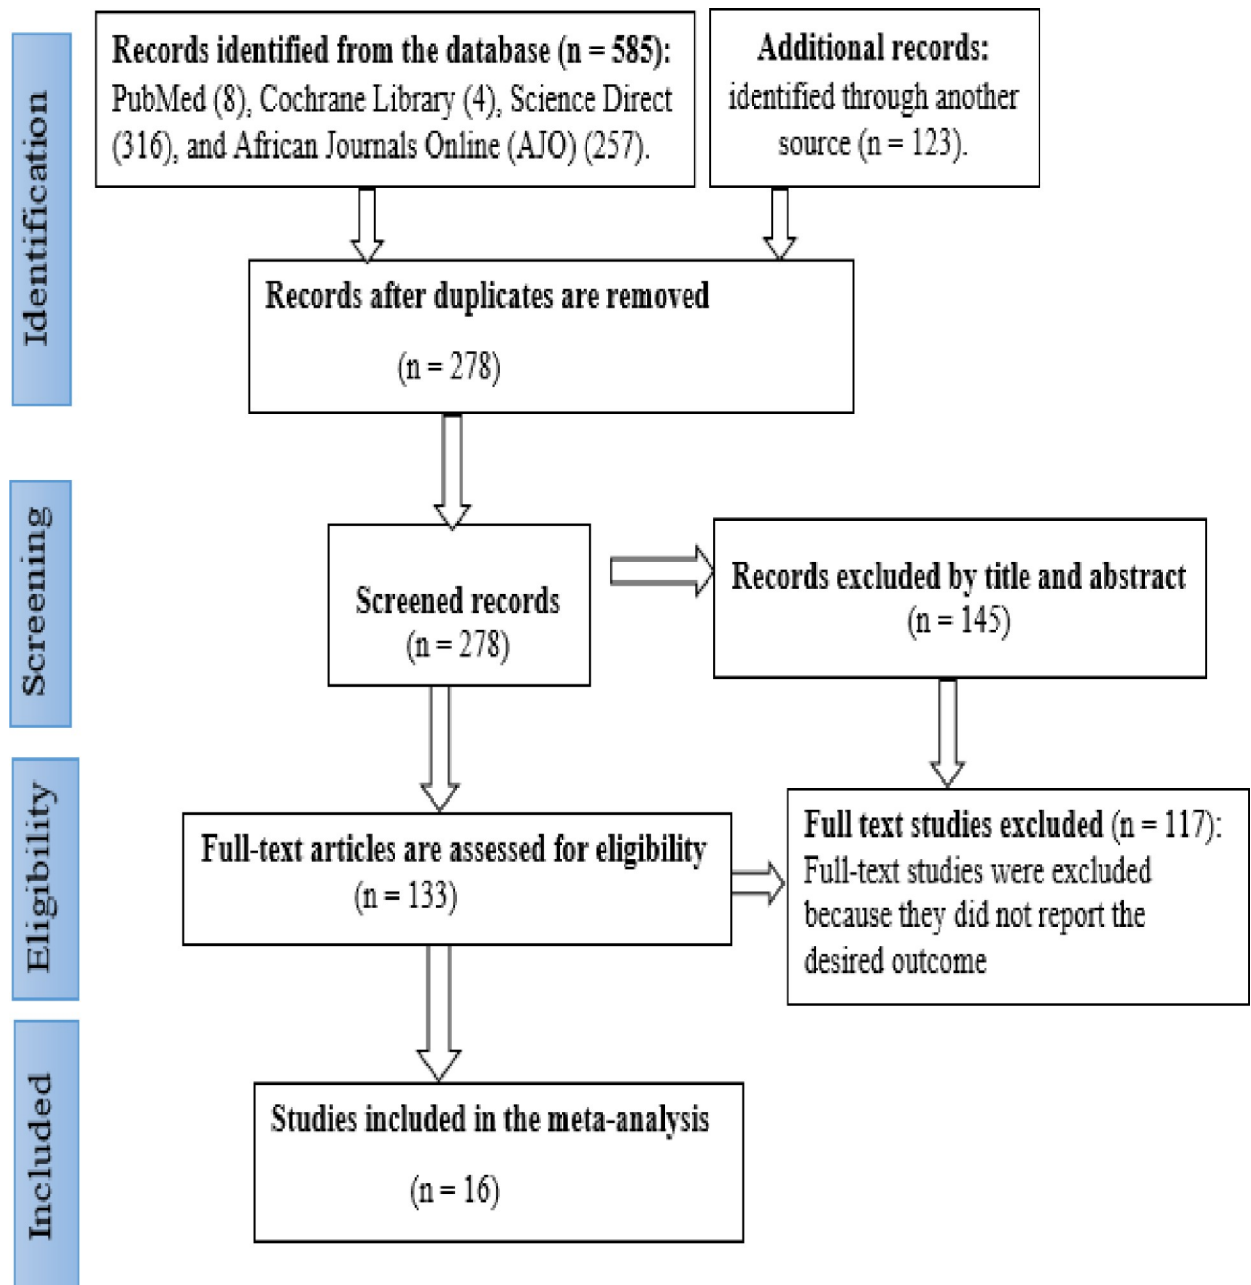

**Fig 1. Flow diagram of study selection for this systematic review and meta-analysis, 2023.**

<https://doi.org/10.1371/journal.pone.0285794.g001>

as statistically significant at a 95% confidence level. The results were presented using graphs, tables, texts, and a forest plot.

## Results

### Searching process

Using the database and manual searching, a total of 708 articles were retrieved. After the duplication was removed, there were 278 articles remaining. Based on their titles and abstracts, 145

articles were excluded. In addition, 117 articles were excluded because they did not report the outcome of interest. Finally, 16 articles were included in this study (Fig 1).

### Characteristics of the included studies

The characteristics of the review, which include the publication year, study location, study region, study setting, methods of data collection, sampling methods, sample size, response rate, and proportion of HWT practice, are all compiled in (Table 1). By design, all included studies were cross-sectional. This study included 16 studies with a total of 42,449 participants [19–23, 28–38]. The included articles were conducted between 2015–2022. The included studies had an average response rate of 98.5%. The included study sample sizes ranged from 377 to 16,650. In this review, a study conducted in the Amhara region at the Farta study site had the lowest proportion of HWT practice (2.8%), while a study conducted in the Amhara region at the Bahir Dar city study site had the highest proportion of HWT practice (76.3%). The majority of the included studies were conducted using interviewers to administer questionnaires. Seven studies from the Amhara region [19, 20, 23, 33, 34, 36, 38]; four studies from the SNNP region [28–30, 32]; one study from the Oromia region [21]; one study from the Benishangul-Gumuz region [37]; one study from both the Oromia and Harari regions [35]; and two studies from the all-region [22, 31] were used to obtain the pooled HWT practices and associated factors (Table 1).

### Meta-analysis

**Pooled proportion of HWT practice in Ethiopia.** The proportion estimate varied among the included studies with significant heterogeneity ( $I^2 = 99.19\%$ ,  $p = 0.00$ ). According to the random effects model, the pooled proportion of HWT practice was 21% (95% CI: 17–24). In this meta-analysis, the proportion of HWT practices in Ethiopia ranged from 3% (95% CI: 2–4) in the Farta study area of the Amhara region [19] to 45% (95% CI: 41–48) in the Burie Zuria of the Amhara region. A forest plot depicts the proportion estimates of HWT practice in Ethiopia (Fig 2).

**Subgroup analysis.** In this study, to perform subgroup analysis, a study region, study setting, and year of publication were used (Figs 3–5). As a result, the study's subgroup analysis revealed that in the SNNPR region, 34% (95% CI: 26–42) and in all regions, 6% (95% CI: 6–7) had the highest and lowest pooled proportions of HWT practice, respectively. Subgroup analysis based on study settings of rural, rural and urban, and urban of the pooled HWT practice was found to be 22% (95% CI: 11–32), 20% (95% CI: 16–23), and 17% (95% CI: 14–19), respectively. On the other hand, a subgroup analysis based on the year of publication was also conducted to see if there were any year-to-year differences in HWT practice. As a result, 21% (95% CI: 13–28) of the pooled proportion of HWT practice was found before 2020, and similarly, 21% (95% CI: 14–29) of the pooled proportion of HWT practice was found after 2020.

**Heterogeneity and publication bias.** The existence of heterogeneity and publication bias was determined within the included studies. The included studies had a high level of heterogeneity ( $I^2 = 99.19\%$ ,  $p = 0.00$ ). The presence of possible small study effects was checked by using a funnel plot and Egger's regression test to declare the presence of publication bias. The funnel plot revealed that the distribution of studies was asymmetrical, whereas Egger's regression test revealed that estimating the pooled proportion of HWT practice was statistically significant ( $p = 0.00$ ), which means there is a publication bias (Fig 6). Thus, Duval and Tweedie's "trim and fill" method was performed to account for publication bias (Fig 7).

**Factors associated with HWT practices in Ethiopia.** In this meta-analysis, factors associated with HWT practice were assessed using 16 studies [19–23, 28–38]. Among the 16 articles,

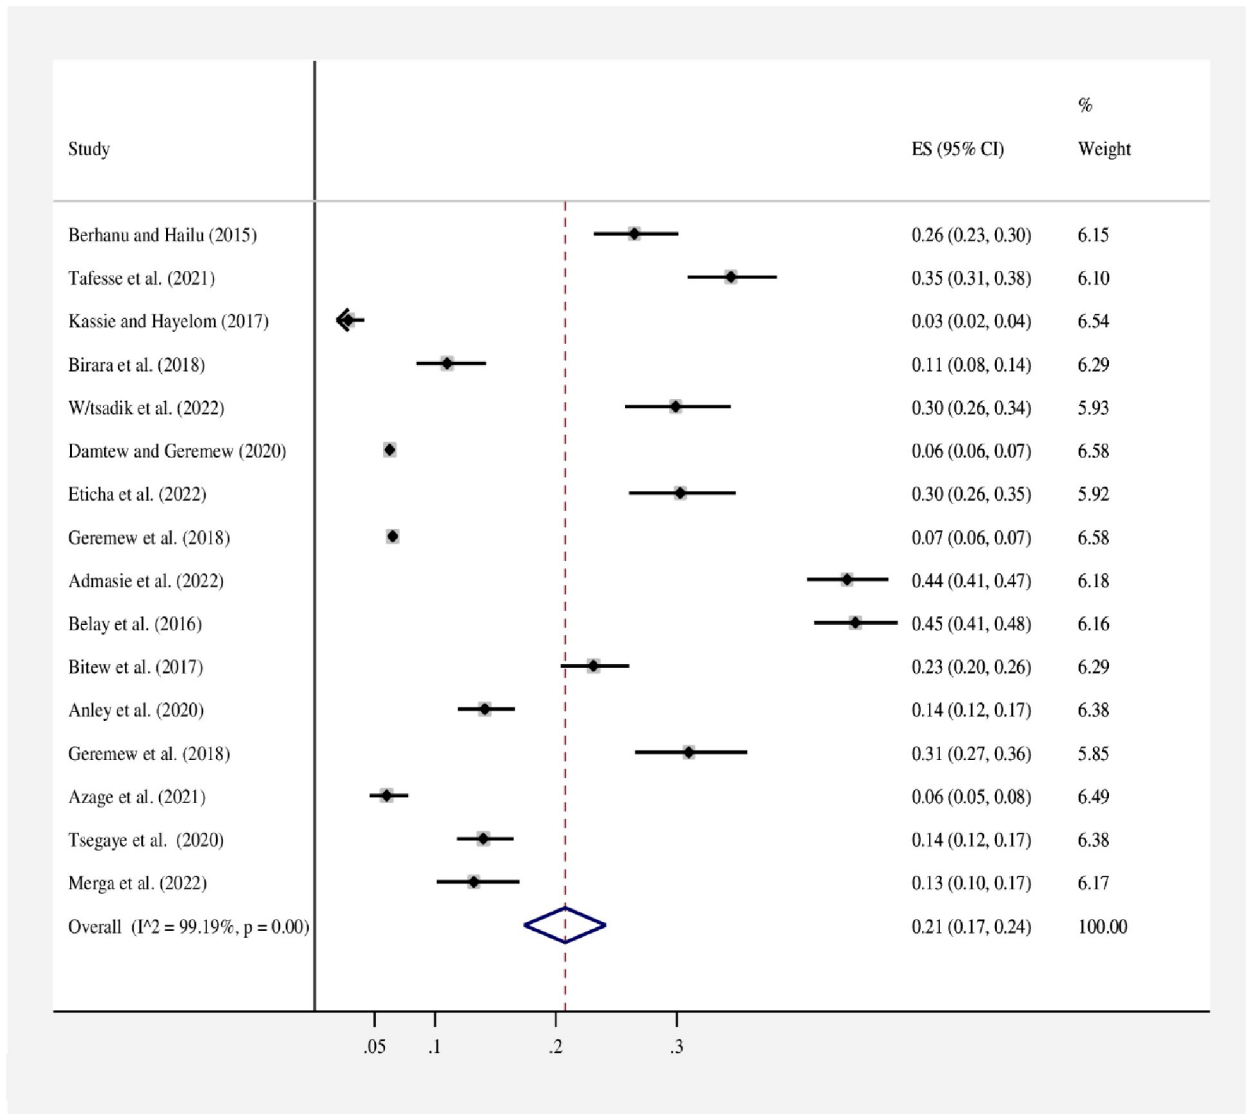

**Fig 2. Forest plot of the proportion of HWT practices in Ethiopia, 2023.** Note: Weights are from random effects model.

<https://doi.org/10.1371/journal.pone.0285794.g002>

the findings of 9 studies [21–23, 28, 29, 31, 33, 34, 36] revealed that HWT practices were significantly associated with educational status. As a result, the likelihood of HWT practice occurring was 2.42 times higher among households that are having formal education than those that are not (OR: 2.42, 95% CI (2.11–2.74)). Households headed by men were 1.32 times more likely to practice HWT than those headed by women (OR: 1.32, 95% CI (1.13–1.51)).

Similarly, the pooled results of this meta-analysis revealed that households with radio ownership were 1.33 times more likely to practice HWT than those without (OR: 1.33, 95% CI (1.18–1.47)). Households with a better income status were 1.73 times more likely to practice HWT than those with a lower income status, according to the pooled results of this meta-analysis (OR: 1.73, 95% CI (1.41–2.04)). Household heads who received training about water treatment were 2.15 times more likely to practice HWT than those who did not (OR, 2.15, 95% CI (1.55–2.75)).



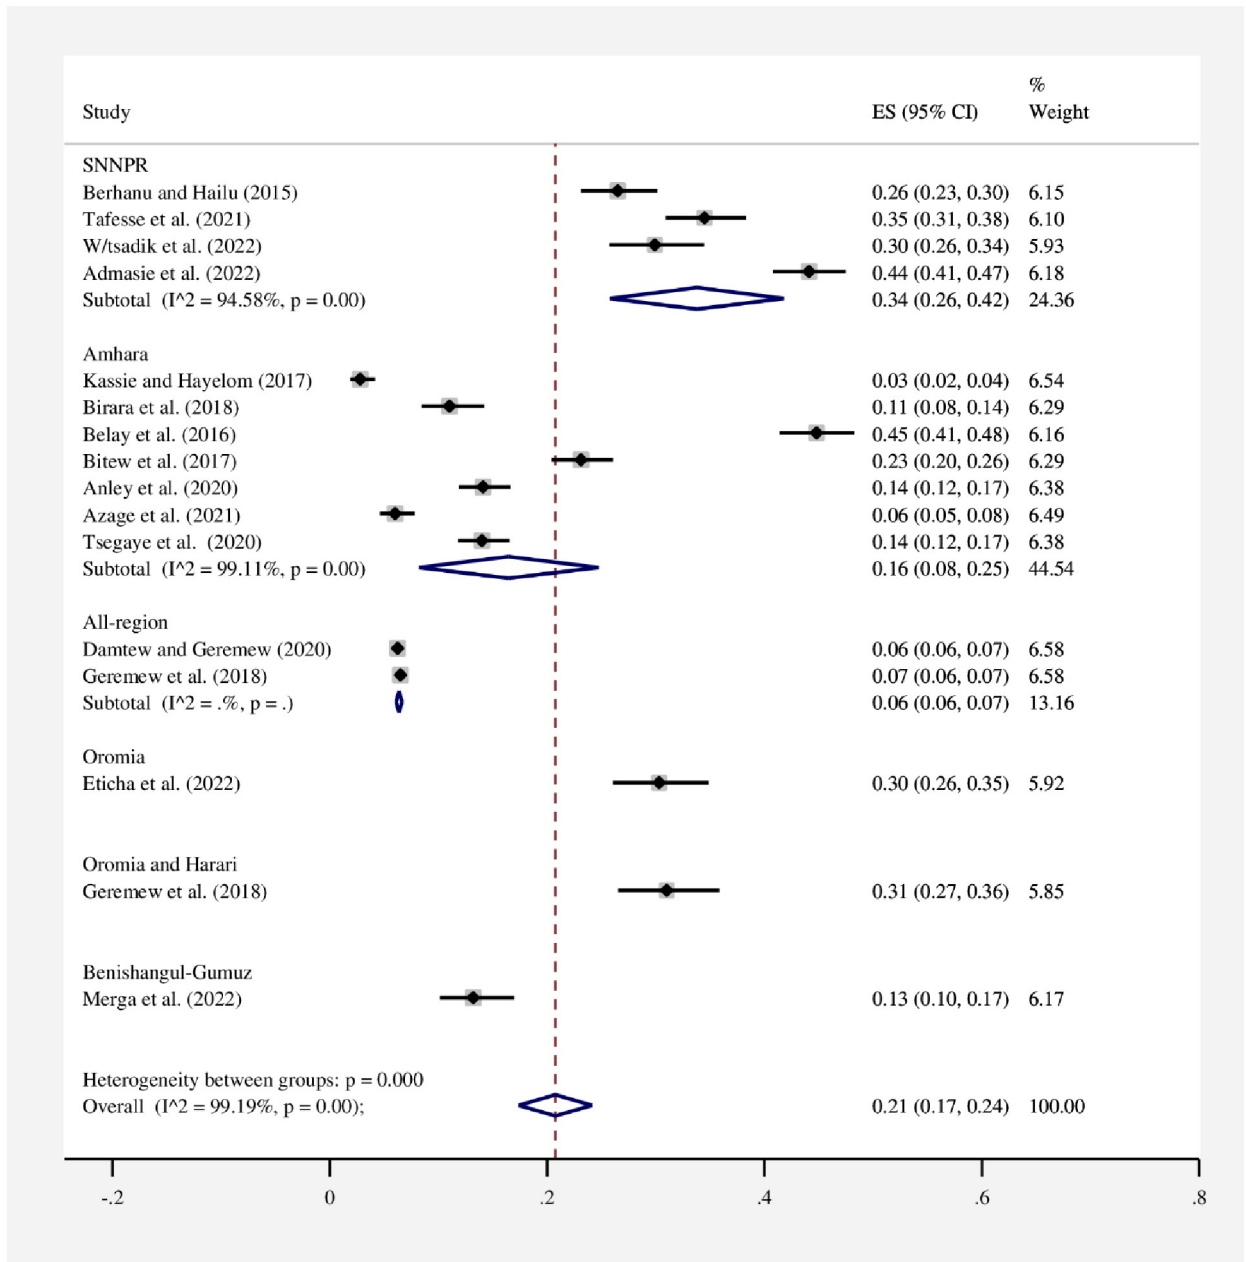

**Fig 3. Subgroup analysis by region for the pooled proportion of HWT practice in Ethiopia, 2023.** Note: Weights are from random-effects model.

<https://doi.org/10.1371/journal.pone.0285794.g003>

A meta-analysis of the relationship between the nature of water sources and HWT practices found that households that used unimproved water sources were 1.71 times more likely to practice HWT than those that used improved water sources (OR: 1.71, 95% CI (1.41–2.01)). Households with a higher frequency of fetching water were 3.31 times more likely to practice HWT than those with a lower frequency of fetching water (OR: 3.31, 95% CI (1.99–4.64)). Finally, households that used the dipping method of water drawing are 2.08 times more likely

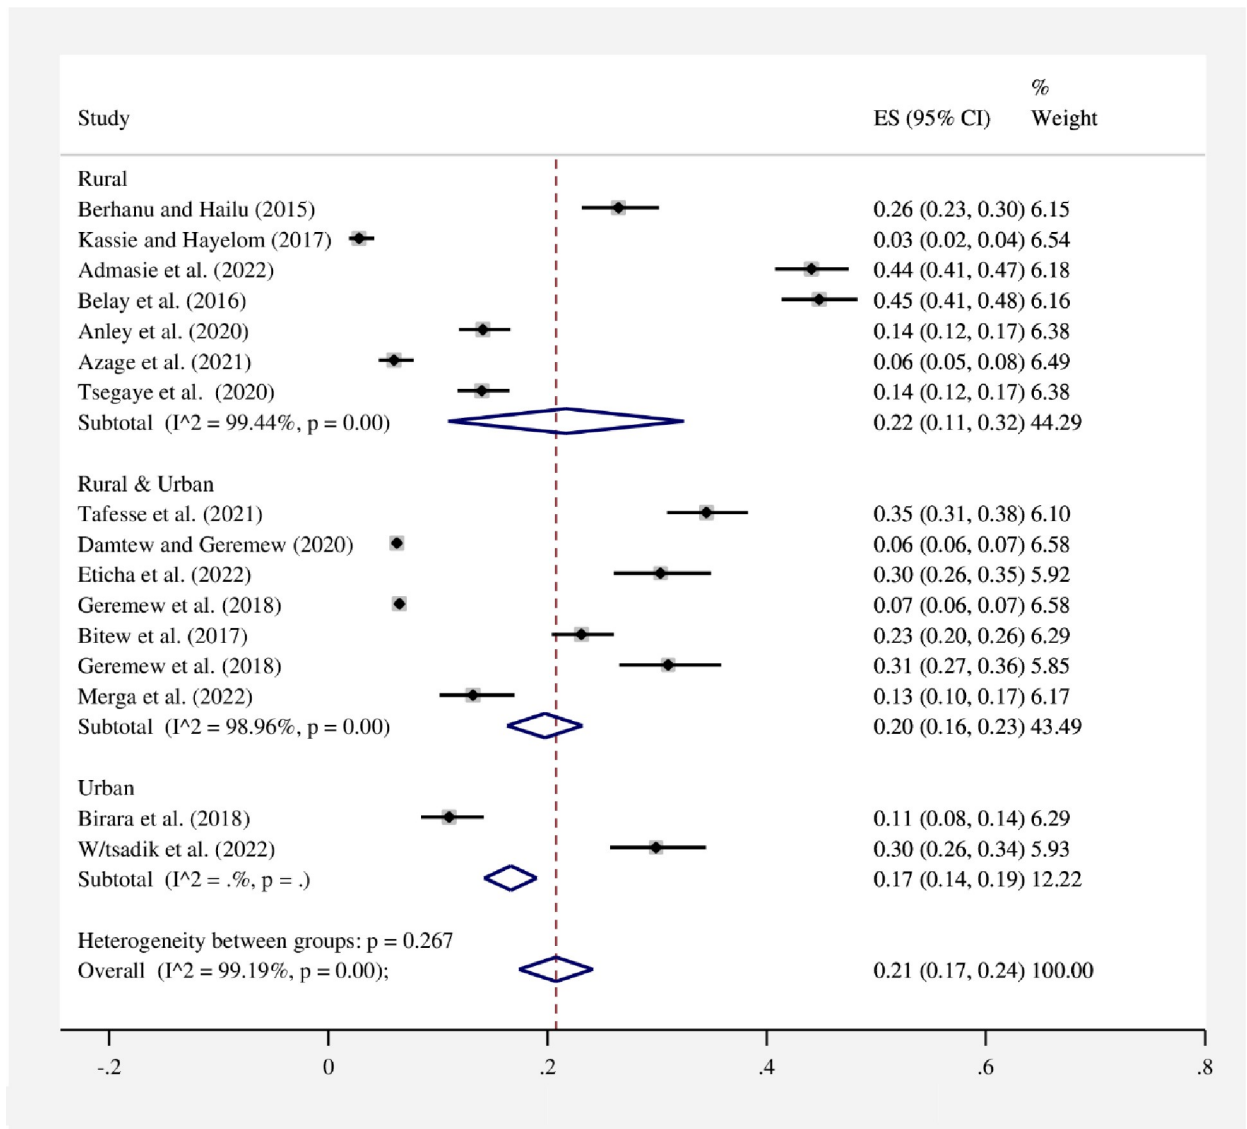

**Fig 4. Subgroup analysis by study settings for the pooled proportion of HWT practice in Ethiopia, 2023.** Note: Weights are from random-effects model.

<https://doi.org/10.1371/journal.pone.0285794.g004>

to practice HWT than households that used the pouring method of water drawing (OR: 2.08, 95% CI (1.66–2.51)) (Table 2).

### Discussion

The provision of potable water is crucial to ensuring the health and dignity of individuals [1]. Hence, HWT is one of the possible methods to improve the quality of drinking water, and it can reduce water-related diseases in developing countries like Ethiopia [39]. In this study, the pooled proportion of HWT practice was found to be 21% (95% CI: 17–24). The pooled proportion of HWT practice was found to vary from region to region and even within regions, and there is also variation in the study setting: rural (22%), rural and urban (20%), and urban

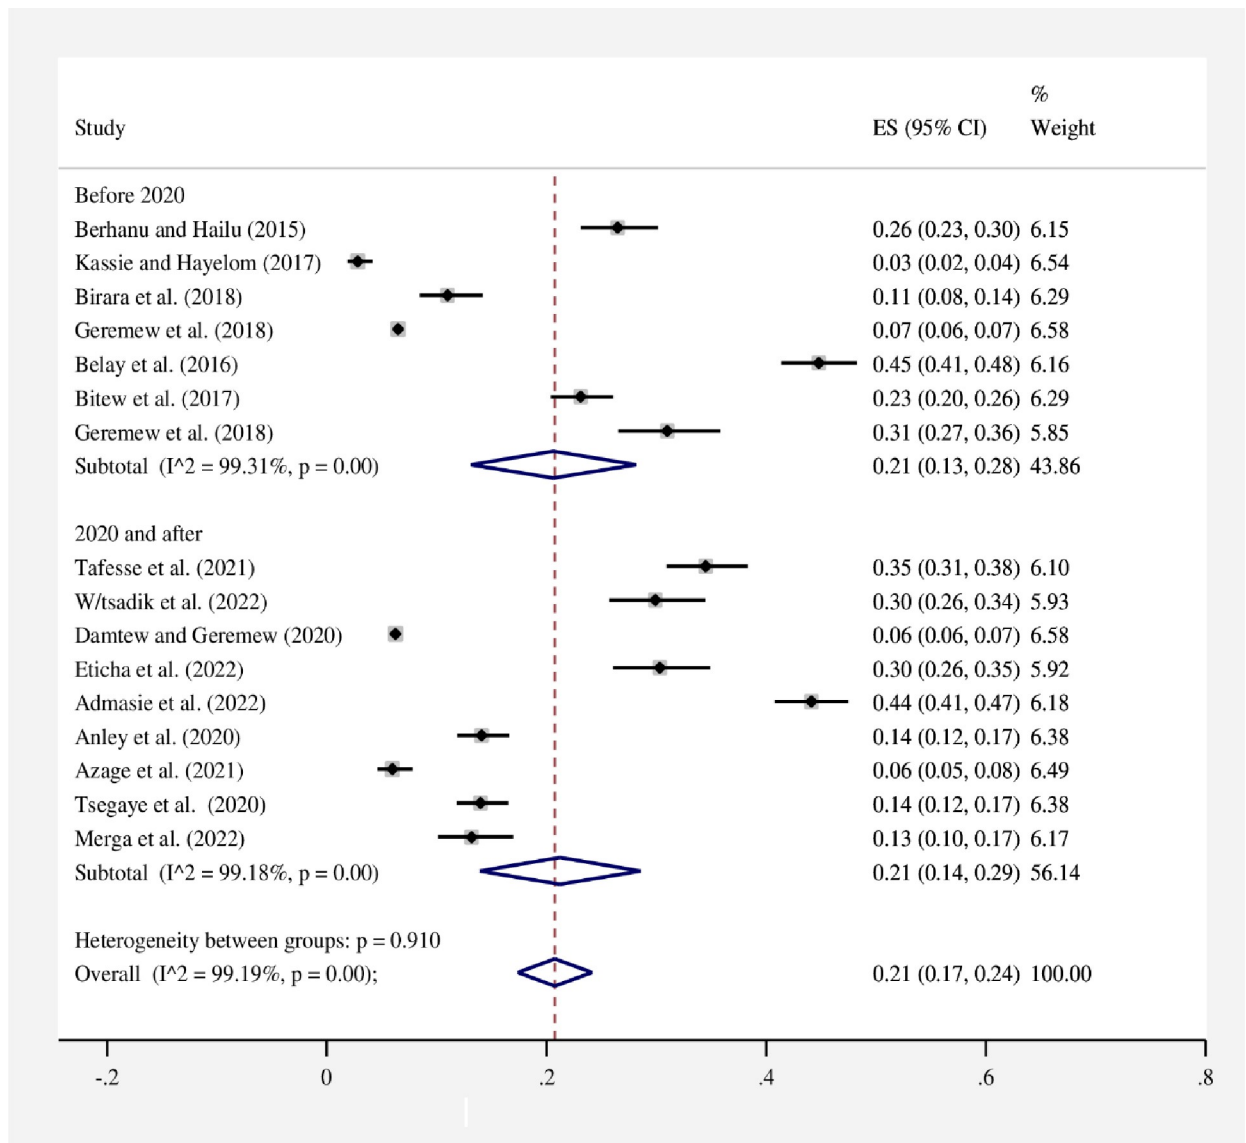

**Fig 5. Subgroup analysis by year of publication for the pooled proportion of HWT practice in Ethiopia, 2023.** Note: Weights are from random-effects model.

<https://doi.org/10.1371/journal.pone.0285794.g005>

(17%). In this study, educational status, sex, radio ownership, income status, water source, frequency of fetching water, methods of water drawing, and water treatment training were all found to be associated with HWT practice.

The finding of the pooled proportion of HWT practice (21%) in this study was found to be significantly lower than a study conducted in Nigeria (45%) [40], Kenya (69%) [41], Indonesia (51%) [42], and India (53%) [43]. The possible explanation for the difference might be due to the variation in accessibility of information about HWT, the study period, and the nature of water source coverage among the countries. The low level of HWT practice in this study might be also due to the unavailability of treatment options, socioeconomic conditions, and knowledge or awareness gaps.

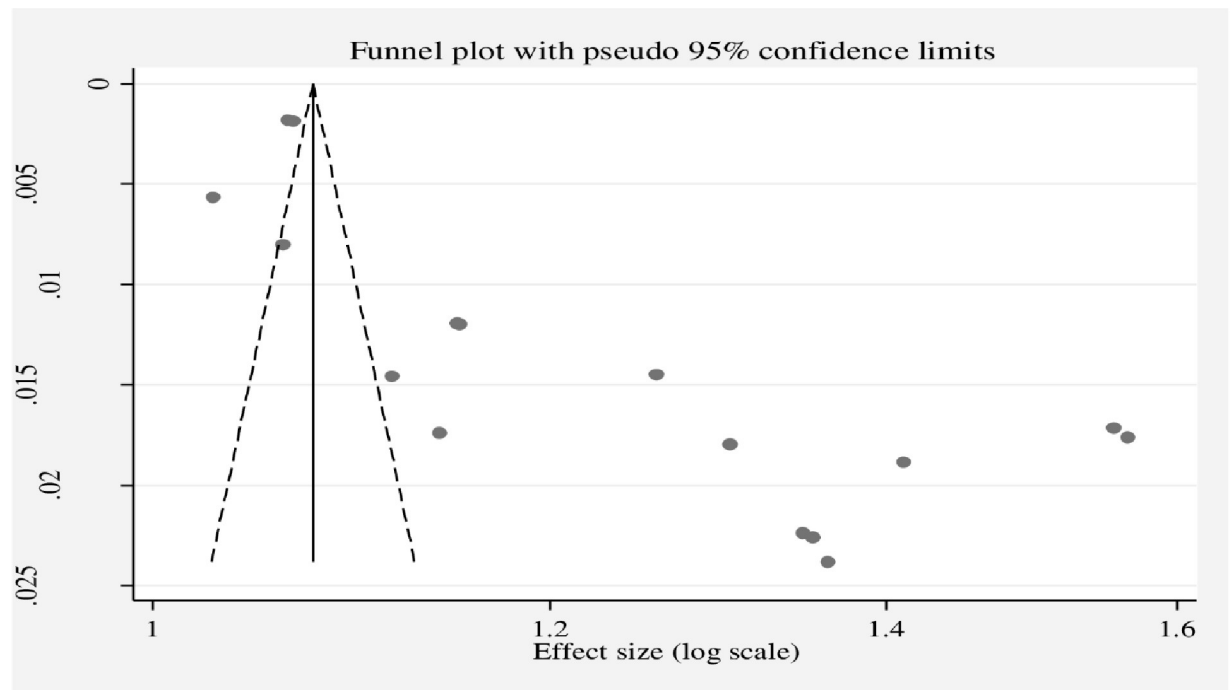

Number of studies = 16 Root MSE = 6.901

| Std_Eff | Coef.    | Std. Err. | t    | P> t  | [95% Conf. Interval] |
|---------|----------|-----------|------|-------|----------------------|
| slope   | .0377815 | .0111795  | 3.38 | 0.004 | .0138038 .0617592    |
| bias    | 11.23773 | 2.252285  | 4.99 | 0.000 | 6.407055 16.0684     |

Test of H0: no small-study effects P = 0.000

Fig 6. Funnel plot and Egger's regression test, respectively, studies of the pooled proportion of HWT practice in Ethiopian, 2023.

<https://doi.org/10.1371/journal.pone.0285794.g006>

The possible plausibility of the variation from region-to-region and within the region might be due to variation in the socio-economic, environmental, and perceptual factors of households as well as the nature of water sources. In the present study, there was a significant degree of heterogeneity among the included studies, which is also supportive evidence for the variation in this study. This heterogeneity might be due to differences in study settings, sample size, study population, and training given to the study population as an intervention [44].

From the findings of the present study, the pooled proportion of HWT practice in a study conducted in rural areas was found to be relatively higher than in urban areas. This is supported by Eticha et al. [21] and Belay et al. [23]. HWT is mostly practiced in areas with unimproved water sources, which are mostly used by rural communities. The possible reason might be due to the risk of potential contamination from unimproved water sources.

In the present study, households with formal education were 2.42 times more likely to practice HWT than those that did not have formal education (OR: 2.42, 95% CI (2.11–2.74)). This

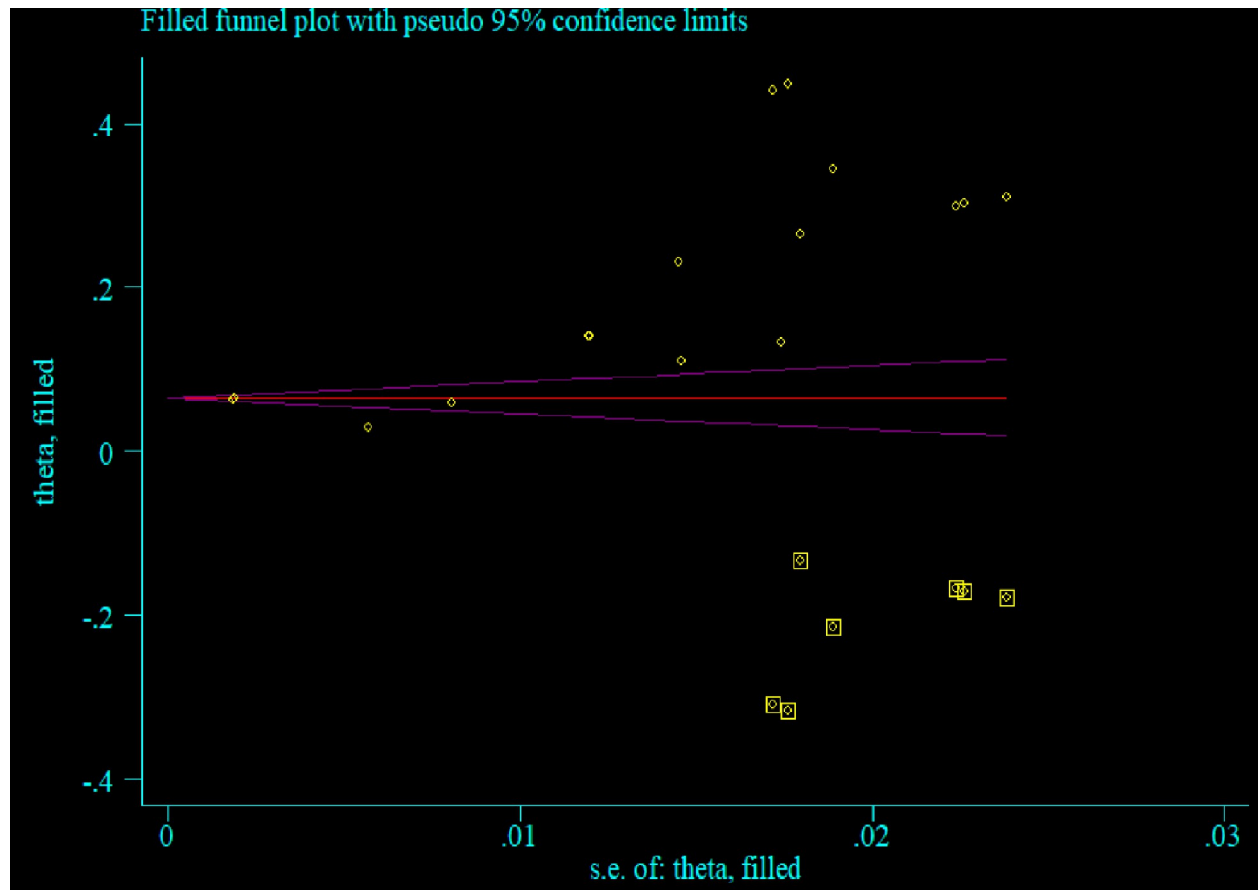

**Fig 7. Funnel plot with 95% CI of a simulated meta-analysis containing 16 studies, 2023.**

<https://doi.org/10.1371/journal.pone.0285794.g007>

finding was supported by a study conducted in Egypt [45] and Indonesia [42]. The possible explanation for this finding might be due to the fact that people who are more educated may have a better understanding of the health risks of drinking contaminated water and might know different types of water treatment methods [42]. Similarly, in this study, households that had taken training about water treatment were found to be 2.15 times more likely to practice HWT than those that had not taken the training. This finding is supported by Komarulzaman et al. [46], they reported that training and education are crucial to ensure HWT practice effectively. Therefore, health care professionals would do better to provide intensive training to households on the HWT, which encourages changes in health behaviour, as it is an appropriate strategy to improve good practice [47–49].

In this study, higher-income households were 1.73 times more likely to practice HWT than lower-income households (OR: 1.73, 95% CI (1.41–2.04)). This finding is supported by a study conducted in low- and middle-income countries [50]. The present finding is also supported by Daniel et al. [51], socioeconomic issues are important factors for HWT adoption. The possible reason behind this might be that households with higher incomes have the ability to afford materials for water treatment than those with lower incomes [33], and households in developing countries like Ethiopia, which focus on fulfilling food requirements for their families, do not focus on treating water at the household level [30].

Table 2. The pooled effect size of factors associated with HWT in Ethiopia, 2023.

| S.N | Variables (Reference)              | Authors and $I^2$ with p-value              | Odds ratio (95% CI)     |
|-----|------------------------------------|---------------------------------------------|-------------------------|
| 1.  | Educational status (Illiterate)    | Tafesse et al.                              | 2.01(1.34, 3.00)        |
|     |                                    | Berhanu and Hailu                           | 3.00(1.50, 6.04)        |
|     |                                    | Eticha et al.                               | 1.60(1.02, 2.93)        |
|     |                                    | Geremew et al.                              | 3.01(2.47, 3.66)        |
|     |                                    | Damtew and Geremew                          | 2.50(1.43, 4.36)        |
|     |                                    | Belay et al.                                | 2.07(1.51, 2.83)        |
|     |                                    | Bitew et al.                                | 2.49(2.11, 2.74)        |
|     |                                    | Azage et al.                                | 1.76(1.02, 3.05)        |
|     |                                    | Anley et al.                                | 5.81(3.60, 9.38)        |
|     |                                    | Overall, IV ( $I^2 = 57.3%$ , $p = 0.016$ ) | <b>2.42(2.11, 2.74)</b> |
| 2.  | Sex (Female)                       | Belay et al.                                | 1.80(1.24, 2.62)        |
|     |                                    | Geremew et al.                              | 1.28(1.28, 1.68)        |
|     |                                    | Overall, IV ( $I^2 = 50.3%$ , $p = 0.156$ ) | <b>1.32(1.13, 1.51)</b> |
| 3.  | Owning radio (No)                  | Geremew et al.                              | 1.21(1.07, 1.38)        |
|     |                                    | Eticha et al.                               | 2.80(2.21, 3.32)        |
|     |                                    | Overall, IV ( $I^2 = 96.6%$ , $p = 0.000$ ) | <b>1.33(1.18, 1.47)</b> |
| 4.  | Income status (Low)                | W/tsadik et al.                             | 2.37(1.22, 4.6)         |
|     |                                    | Admasie et al.                              | 1.50(1.23, 3.47)        |
|     |                                    | Geremew et al.                              | 1.55(1.14, 2.11)        |
|     |                                    | Damtew and Geremew                          | 1.97(1.12, 3.47)        |
|     |                                    | Bitew et al.                                | 1.78(1.33, 2.37)        |
|     |                                    | Anley et al.                                | 2.78(1.50, 5.15)        |
|     |                                    | Overall, IV ( $I^2 = 0.0%$ , $p = 0.745$ )  | <b>1.73(1.41, 2.04)</b> |
| 5.  | Water sources (Improved)           | Geremew et al.                              | 1.76(1.39, 2.22)        |
|     |                                    | Bitew et al.                                | 1.52(1.13, 2.04)        |
|     |                                    | Eticha et al.                               | 2.99(1.97, 4.94)        |
|     |                                    | Overall, IV ( $I^2 = 44.1%$ , $p = 0.167$ ) | <b>1.71(1.41, 2.01)</b> |
| 6.  | Frequency of fetching water (Low)  | Tafesse et al.                              | 2.65(1.45, 4.88)        |
|     |                                    | Admasie et al.                              | 2.80(1.21, 9.17)        |
|     |                                    | Belay et al.                                | 4.87(3.00, 7.91)        |
|     |                                    | Overall, IV ( $I^2 = 8.4%$ , $p = 0.336$ )  | <b>3.31(1.99, 4.64)</b> |
| 7.  | Methods of water drawing (Pouring) | Tafesse et al.                              | 1.86(1.20, 2.87)        |
|     |                                    | Admasie et al.                              | 1.67(1.14, 2.42)        |
|     |                                    | Belay et al.                                | 3.41(2.48, 4.69)        |
|     |                                    | Anley et al.                                | 2.38(1.52, 3.70)        |
|     |                                    | Overall, IV ( $I^2 = 61.0%$ , $p = 0.053$ ) | <b>2.08(1.66, 2.51)</b> |
| 8.  | Water treatment training (No)      | Eticha et al.                               | 2.99(1.97, 4.94)        |
|     |                                    | Azage et al.                                | 1.99(1.44, 2.75)        |
|     |                                    | Overall, IV ( $I^2 = 31.4%$ , $p = 0.227$ ) | <b>2.15(1.55, 2.75)</b> |

<https://doi.org/10.1371/journal.pone.0285794.t002>

The present study reported that households that used unimproved water sources, which are not protected from external sources of contamination, were 1.71 times more likely to practice HWT than those that used improved water sources (OR: 1.71, 95% CI (1.41–2.01)). This finding is supported by WHO [1], which explains households with unimproved sources that have a potential risk of contamination. This could be explained by the fact that households that believe their water source is contaminated or unimproved are more likely to try to treat their water at home than those who use improved water sources [23, 33].

This study showed that households who fetched water more frequently were 3.31 times more likely to practice HWT than those households who fetched water less frequently (OR: 3.31, 95% CI (1.99–4.64)). This finding is supported by a study conducted in Nigeria [40]. The possible plausibility could be that those who were fetching water more frequently had a higher likelihood to store their water, allowing them to treat their water by storing it through sedimentation [32]. The finding might imply that access to water and storage containers was crucial for households to implement the ability to practice HWT [42].

This study also revealed that participants who draw their water from a storage container by dipping were 2 times more likely to practice HWT than those who draw their water by pouring (OR: 2.08, 95% CI (1.66–2.51)). This finding is supported by WHO [39] and Tafesse et al. [29]. The possible reason for this result might be the fact that those who withdraw water from the storage container by the dipping method increase the risk of potential contamination. Hands can enter the container and contaminate the water during the withdrawal of water by the dipping method. Therefore, the dipping method is not a safe method of water handling; hence, to avoid those contaminants, households may practice the HWT method [52].

This study has its own limitations. This study was considered a study conducted using a cross-sectional study design, so it could not establish cause-and-effect relationships. This study also considered only articles published in English that were used for this systematic review and meta-analysis. Moreover, this study was not considered a qualitative study that reported the psychological factors or perceptions of people.

## Conclusions

Based on the findings of this study, the pooled proportion of HWT practice in Ethiopia was found to be one-fifth, which indicated that it was significantly low. The major determinant factors contributing to low HWT practice in this study was lack of formal education, low frequency of fetching water, poor hygiene practices, and a lack of adequate information and training. Therefore, the authors recommend that households could better receive adequate information about HWT practices through strengthened health education and intensive training on HWT to improve their HWT practice. Moreover, the concerned body could also better provide households with access to water.

## Supporting information

**S1 Table. PRISMA-P 2009 checklist.**

(DOCX)

**S2 Table. Results of JBI quality assessment.**

(DOCX)

## Acknowledgments

The authors would like to thank Wollo University, Ethiopia, for providing an office and free internet service. Moreover, authors thanked and recognized the articles included in this study and used them as a basis for this systematic review and meta-analysis.

## Author Contributions

**Conceptualization:** Belay Desye.

**Data curation:** Belay Desye, Tadesse Sisay.

**Formal analysis:** Belay Desye, Amensisa Hailu Tesfaye.

**Methodology:** Belay Desye, Amensisa Hailu Tesfaye, Gete Berihun, Tadesse Sisay, Chala Daba, Leykun Berhanu.

**Software:** Belay Desye, Amensisa Hailu Tesfaye, Chala Daba.

**Supervision:** Gete Berihun, Tadesse Sisay, Leykun Berhanu.

**Validation:** Leykun Berhanu.

**Writing – original draft:** Belay Desye, Amensisa Hailu Tesfaye, Gete Berihun, Tadesse Sisay.

**Writing – review & editing:** Belay Desye, Amensisa Hailu Tesfaye, Gete Berihun, Tadesse Sisay, Chala Daba, Leykun Berhanu.

## References

1. WHO. Household water treatment and safe storage: Manual for the trainer. 2013 [cited 31 Jan 2023]. Available: <https://www.google.com/search?q=HOUSEHOLD+WATER+TREATMENT+AND+SAFE+STORAGE&aq=HOUSEHOLD+WATER+TREATMENT+AND+SAFE+STORAGE&aqs=chrome..69i57j69i59i450l6j69i61.464j0j7&sourceid=chrome&ie=UTF-8>
2. WHO/UNICEF. Progress on household drinking water, sanitation and hygiene 2000–2020: Five years into the SDGs. 2021 [cited 7 Aug 2022]. Available: <https://www.who.int/publications-detail-redirect/9789240030848>
3. WHO. Household water treatment and safe storage western pacific. In: International Journal of Environment, Agriculture and Biotechnology [Internet]. 2010 [cited 26 Sep 2022]. Available: <https://ijeab.com/detail/water-supply-and-health-drinking-water-and-sanitation-coverage-in-ethiopia-1990-2015-review/>
4. Cotruvo JA, Sobsey M. Point-of-Use Water treatment for Home and Travel. WATER AND HEALTH. 2009; 9.
5. Fewtrell L, Kaufmann RB, Kay D, Enanoria W, Haller L, Colford JM. Water, sanitation, and hygiene interventions to reduce diarrhoea in less developed countries: a systematic review and meta-analysis. Lancet Infect Dis. 2005; 5: 42–52. [https://doi.org/10.1016/S1473-3099\(04\)01253-8](https://doi.org/10.1016/S1473-3099(04)01253-8) PMID: 15620560
6. Pickering AJ, Null C, Winch PJ, Mangwadu G, Arnold BF, Prendergast AJ, et al. The WASH Benefits and SHINE trials: interpretation of WASH intervention effects on linear growth and diarrhoea. The Lancet Global Health. 2019; 7: e1139–e1146. [https://doi.org/10.1016/S2214-109X\(19\)30268-2](https://doi.org/10.1016/S2214-109X(19)30268-2) PMID: 31303300
7. WHO. Combating waterborne disease at the household level. Geneva, Switzerland: World Health Organization (WHO); 2007.
8. WHO/UNICEF. Diarrhoea: Why children are still dying and what can be done. 2009 [cited 26 Sep 2022]. Available: <https://www.who.int/publications-detail-redirect/9789241598415>
9. Darvesh N, Das JK, Vaivada T, Gaffey MF, Rasanathan K, Bhutta ZA, et al. Water, sanitation and hygiene interventions for acute childhood diarrhea: a systematic review to provide estimates for the Lives Saved Tool. BMC Public Health. 2017; 17: 776. <https://doi.org/10.1186/s12889-017-4746-1> PMID: 29143638
10. WHO. Drinking-water, sanitation and hygiene in the Western Pacific Region: opportunities and challenges in the SDG era. 2018 [cited 26 Sep 2022]. Available: <https://www.who.int/publications-detail-redirect/9789290618614>
11. Geremew A, Damtew YT. Household water treatment using adequate methods in sub-Saharan Countries: evidence from 2013–2016 Demographic and Health Surveys. Journal of Water, Sanitation and Hygiene for Development. 2019; 10. <https://doi.org/10.2166/washdev.2019.107>
12. Central Statistical Agency (CSA) [Ethiopia] and ICF, 2016. Ethiopia demographic and health survey 2016. Addis Ababa, Ethiopia and Rockville, Maryland, USA: CSA and ICF. [cited 6 Apr 2023]. Available: <https://www.google.com/search?q=Ethiopian+demograph+health+survey+2016&aqs=chrome..69i57j0i13i512j0i22i30l3j0i390i650l2j69i60.16613j0j7&sourceid=chrome&ie=UTF-8>
13. Dangol B. Household Water Treatment and Safe Storage (HWTS) | SSWM—Find tools for sustainable sanitation and water management. fact sheet. [cited 27 Sep 2022]. Available: [https://sswm.info/sswm-solutions-bop-markets/affordable-wash-services-and-products/affordable-water-supply/household-water-treatment-and-safe-storage-\(hwts\)](https://sswm.info/sswm-solutions-bop-markets/affordable-wash-services-and-products/affordable-water-supply/household-water-treatment-and-safe-storage-(hwts))
14. WHO/UNICEF. Meeting the MDG drinking water and sanitation target: a mid-term assessment of progress. World Health Organization; 2004. Available: <https://apps.who.int/iris/handle/10665/43021>



15. Verhougstraete M, Reynolds KA, Pearce-Walker J, Gerba C. Cost-benefit analysis of point-of-use devices for health risks reduction from pathogens in drinking water. *J Water Health*. 2020; 18: 968–982. <https://doi.org/10.2166/wh.2020.111> PMID: 33328368
16. Mokoena M, Mudau L, Mokgobu I, Mukhola M. The Use of Sodium Hypochlorite at Point-of-Use to Remove Microcystins from Water Containers. *Toxins*. 2021; 13: 207. <https://doi.org/10.3390/toxins13030207> PMID: 33809162
17. Hill CL, McCain K, Nyathi ME, Edokpayi JN, Kahler DM, Operario DJ, et al. Impact of Low-Cost Point-of-Use Water Treatment Technologies on Enteric Infections and Growth among Children in Limpopo, South Africa. *Am J Trop Med Hyg*. 2020; 103: 1405–1415. <https://doi.org/10.4269/ajtmh.20-0228> PMID: 32840201
18. Mengistie B, Berhane Y, Worku A. Household Water Chlorination Reduces Incidence of Diarrhea among Under-Five Children in Rural Ethiopia: A Cluster Randomized Controlled Trial. *PLOS ONE*. 2013; 8: e77887. <https://doi.org/10.1371/journal.pone.0077887> PMID: 24194899
19. Kassie GG, Hayelom DH. Assessment of Water Handling and Sanitation Practices Among Rural Communities of Farta Woreda, Northwest Ethiopia. *American Journal of Health Research*. 2017; 5: 119. <https://doi.org/10.11648/j.ajhr.20170505.11>
20. Birara A, Destaw B, Addis K. Household Water Treatment Practice and Associated Factors Among People Living with HIV, Bahir Dar City Administration, Northwest Ethiopia. *International Journal of Bio-medical Science and Engineering*. 2018; 6: 32. <https://doi.org/10.11648/j.ijbse.20180602.12>
21. Eticha M, Geremew A, Dirirsa G, Bayu K, Girma H, Mengistu DA. Household water treatment practice and associated factors among households dependent on unimproved water sources in Ameya district, Oromia, Ethiopia. *Journal of Water, Sanitation and Hygiene for Development*. 2022; 11.
22. Geremew A, Mengistie B, Mellor J, Lantagne DS, Alemayehu E, Sahilu G. Appropriate household water treatment methods in Ethiopia: household use and associated factors based on 2005, 2011, and 2016 EDHS data. *Environmental Health and Preventive Medicine*. 2018; 23: 46. <https://doi.org/10.1186/s12199-018-0737-9> PMID: 30261840
23. Belay H, Dagne Z, Abebe N. Small scale water treatment practice and associated factors at Burie Zuria Woreda Rural Households, Northwest Ethiopia, 2015: cross sectional study. *BMC Public Health*. 2016; 16: 887. <https://doi.org/10.1186/s12889-016-3571-2> PMID: 27562323
24. Ethiopia Population Projection. Ethiopia Population 2022 (Demographics, Maps, Graphs). 2022 [cited 24 Aug 2022]. Available: <https://worldpopulationreview.com/countries/ethiopia-population>
25. Preferred reporting items for systematic review and meta-analysis protocols (PRISMA-P) 2015 statement | SpringerLink. [cited 19 Nov 2020]. Available: <https://link.springer.com/article/10.1186/2046-4053-4-1>
26. JBI. Checklist for Analytical Cross-Sectional Studies—Google Search. 2017 [cited 29 Sep 2022].
27. Higgins JPT, Thompson SG. Quantifying heterogeneity in a meta-analysis. *Stat Med*. 2002; 21: 1539–1558. <https://doi.org/10.1002/sim.1186> PMID: 12111919
28. Berhanu A, Hailu D. Bacteriological and Physicochemical Quality of Drinking Water Sources and Household Water Handling Practice Among Rural Communities of Bona District, Sidama Zone-Zouthern, Ethiopia. *Science Journal of Public Health*. 2015; 3: 782. <https://doi.org/10.11648/j.sjph.20150305.37>
29. Tafesse B, Gobena T, Baraki N, Alemeshet Asefa Y, Adare Mengistu D. Household Water Treatment Practice and Associated Factors in Gibe District Southern Ethiopia: A Community Based Cross-Sectional Study. *Environ Health Insights*. 2021; 15: 11786302211060150. <https://doi.org/10.1177/11786302211060150> PMID: 34866908
30. Sisay W/tsadik D, Debela BG, Ali Ewune H, Hareru HE. Determinants of Household-Level Water Treatment Practices in Southern Ethiopia. *Environmental Health Insights*. 2022; 16: 11786302221109400. <https://doi.org/10.1177/11786302221109399> PMID: 35782318
31. Damtew YT, Geremew A. Households with unimproved water sources in Ethiopia: spatial variation and point-of-use treatment based on 2016 Demographic and Health Survey. *Environmental Health and Preventive Medicine*. 2020; 25: 81. <https://doi.org/10.1186/s12199-020-00921-1> PMID: 33287699
32. Admasie A, Abera K, Feleke FW. Household Water Treatment Practice and Associated Factors in Rural Households of Sodo Zuria District, Southern Ethiopia: Community-Based Cross-Sectional Study. *Environmental Health Insights*. 2022; 16: 11786302221095036. <https://doi.org/10.1177/11786302221095036> PMID: 35479294
33. Bitew BD, Gete YK, Biks GA, Adafrie TT. Knowledge, Attitude, and Practice of Mothers/Caregivers on Household Water Treatment Methods in Northwest Ethiopia: A Community-Based Cross-Sectional Study. *Am J Trop Med Hyg*. 2017; 97: 914–922. <https://doi.org/10.4269/ajtmh.16-0860> PMID: 28722624

34. Anley Y, Molla M, Mohammed A. Assessment of Household Water Treatment Practice and Associated factors in Rural Kebeles of Degadamot Woreda, North West Ethiopia—Google Search. 2020 [cited 30 Sep 2022].
35. Geremew A, Mengistie B, Mellor J, Lantagne DS, Alemayehu E, Sahilu G. Consistent point-of-use water chlorination among households using unimproved water sources and treatment preference in Eastern Ethiopia. *Int J Environ Health Res.* 2019; 29: 686–701. <https://doi.org/10.1080/09603123.2019.1569210> PMID: 30694087
36. Azage M, Motbainor A, Gedamu G. Access to improved water and household water treatment practice in rural communities of Amhara Region, Ethiopia. *PAMJ—One Health.* 2021; 6. <https://doi.org/10.11604/pamj-oh.2021.6.4.28481>
37. Merga CA, Tadesse2 F, Baye2 D, Seleman2 A. Assessment of Drinking Water Accessibility, Handling and Treatment Practice in Assosa Woreda, Benishangul Gumuz Region, North West Ethiopia. *International Research Journal of Public Health.* 20220302; 6. doi:10.28933/irjph-2022-01-2205
38. Tsegaye D, Anley Y, Negese B, Yalew Z. Assessment of Knowledge and Practice of House Hold Water Treatment and Associated Factors in Rural Kebeles of Degadamot Woreda, North-West Ethiopia, 2020. 2021; 12: 1–5.
39. WHO. Drinking-water. 2022 [cited 5 Apr 2023]. Available: <https://www.who.int/news-room/fact-sheets/detail/drinking-water>
40. Abubakar IR. Understanding the socioeconomic and environmental indicators of household water treatment in Nigeria. *Utilities Policy.* 2021; 70: 101209. <https://doi.org/10.1016/j.jup.2021.101209>
41. SNV. Understanding the Effects of Poor Sanitation on Public Health, the Environment and Well-Being Report of a Study Conducted in Homa Bay, Elgeyo Marakwet and Kericho Counties in Kenya. 2018.
42. Daniel D, Pande S, Rietveld LC. Socio-Economic and Psychological Determinants for Household Water Treatment Practices in Indigenous–Rural Indonesia. *Frontiers in Water.* 2021; 3. <https://doi.org/10.3389/frwa.2021.649445>
43. Kuberan A, Singh AK, Kasav JB, Prasad S, Surapaneni KM, Upadhyay V, et al. Water and sanitation hygiene knowledge, attitude, and practices among household members living in rural setting of India. *J Nat Sci Biol Med.* 2015; 6: S69–74. <https://doi.org/10.4103/0976-9668.166090> PMID: 26604623
44. Imrey PB. Limitations of Meta-analyses of Studies With High Heterogeneity. *JAMA Netw Open.* 2020; 3: e1919325. <https://doi.org/10.1001/jamanetworkopen.2019.19325> PMID: 31922554
45. Wright J, Gundry S, Conroy R. Household drinking water in developing countries: a systematic review of microbiological contamination between source and point-of-use. *Trop Med Int Health.* 2004; 9: 106–117. <https://doi.org/10.1046/j.1365-3156.2003.01160.x> PMID: 14728614
46. Komarulzaman A, Smits J, de Jong E. Clean water, sanitation and diarrhoea in Indonesia: Effects of household and community factors. *Glob Public Health.* 2017; 12: 1141–1155. <https://doi.org/10.1080/17441692.2015.1127985> PMID: 26758565
47. Daniel D, Pande S, Rietveld L. Endogeneity in water use behaviour across case studies of household water treatment adoption in developing countries. *World Development Perspectives.* 2022; 25: 1–9. <https://doi.org/10.1016/j.wdp.2021.100385>
48. Grady CA, Kipkorir EC, Nguyen K, Blatchley ER. Microbial quality of improved drinking water sources: evidence from western Kenya and southern Vietnam. *J Water Health.* 2015; 13: 607–612. <https://doi.org/10.2166/wh.2014.206> PMID: 26042991
49. Gizaw Z, Gebrehiwot M, Destaw B, Nigusie A. Access to basic drinking water services, safe water storage, and household water treatment practice in rural communities of northwest Ethiopia. *Sci Rep.* 2022; 12: 20623. <https://doi.org/10.1038/s41598-022-25001-y> PMID: 36450840
50. Stoler J, Miller JD, Brewis A, Freeman MC, Harris LM, Jepson W, et al. Household water insecurity will complicate the ongoing COVID-19 response: Evidence from 29 sites in 23 low- and middle-income countries. *Int J Hyg Environ Health.* 2021; 234: 113715. <https://doi.org/10.1016/j.ijheh.2021.113715> PMID: 33735823
51. Daniel D, Diener A, Pande S, Jansen S, Marks S, Meierhofer R, et al. Understanding the effect of socio-economic characteristics and psychosocial factors on household water treatment practices in rural Nepal using Bayesian Belief Networks. *Int J Hyg Environ Health.* 2019; 222: 847–855. <https://doi.org/10.1016/j.ijheh.2019.04.005> PMID: 31047815
52. Rosa G, Kelly P, Clasen T. Consistency of Use and Effectiveness of Household Water Treatment Practices among Urban and Rural Populations Claiming to Treat Their Drinking Water at Home: A Case Study in Zambia. *Am J Trop Med Hyg.* 2016; 94: 445–455. <https://doi.org/10.4269/ajtmh.15-0563> PMID: 26572868
